# Supplementary material for: What We Know About Sting-Related Deaths? Human Fatalities Caused by Hornet, Wasp and Bee Stings in Europe (1994-2016)
Source: Preprints.org preprint supplement (doi:10.20944/preprints202112.0483.v1), 2021-12-30
Supplement: Supplementary file 1 [file supplementary]

**Supplementary Table 4.** Absolute and relative frequency of the deaths due to hornet, wasp and bee stings by gender; and the X23 gender ratio (X23GR) of mortality and the X23 gender differential (X23GD) in mortality.

| Country | Men | Woman | % Men | % Woman | X23GR <sup>1</sup> | X23GD <sup>2</sup> |
|---------|-----|-------|-------|---------|--------------------|--------------------|
| AT      | 54  | 19    | 74    | 26      | 2.8                | 35                 |
| BE      | 20  | 7     | 74.1  | 25.9    | 2.9                | 13                 |
| BA      | -   | -     | -     | -       | -                  | -                  |
| BG      | 24  | 2     | 92.3  | 7.7     | 12                 | 22                 |
| HR      | 28  | 7     | 80    | 20      | 4                  | 21                 |
| CZ      | 75  | 36    | 67.6  | 32.4    | 2.1                | 39                 |
| EE      | 11  | 3     | 78.6  | 21.4    | 3.7                | 8                  |
| FI      | 20  | 5     | 80    | 20      | 4                  | 15                 |
| FR      | 162 | 49    | 76.8  | 23.2    | 3.3                | 113                |
| DE      | 242 | 85    | 74    | 26      | 2.8                | 157                |
| EL      | 9   | 0     | 100   | 0       | nc                 | 9                  |
| HU      | 82  | 30    | 73.2  | 26.8    | 2.7                | 52                 |
| IS      | -   | -     | -     | -       | -                  | -                  |
| IE      | 2   | 0     | 100   | 0       | nc                 | 2                  |
| IT      | 59  | 10    | 85.5  | 14.5    | 5.9                | 49                 |
| LV      | 8   | 1     | 88.9  | 11.1    | 8                  | 7                  |
| LT      | 6   | 1     | 85.7  | 14.3    | 6                  | 5                  |
| LU      | 1   | 0     | 100   | 0       | nc                 | 1                  |
| MT      | -   | -     | -     | -       | -                  | -                  |
| ME      | -   | -     | -     | -       | -                  | -                  |
| NL      | 18  | 2     | 90    | 10      | 9                  | 16                 |
| NO      | 11  | 8     | 57.9  | 42.1    | 1.4                | 3                  |
| PL      | 98  | 27    | 78.4  | 21.6    | 3.6                | 71                 |
| PT      | 9   | 0     | 100   | 0       | nc                 | 9                  |
| RO      | 130 | 19    | 87.2  | 12.8    | 6.8                | 111                |
| RS      | 45  | 8     | 84.9  | 15.1    | 5.6                | 37                 |
| SK      | 16  | 1     | 94.1  | 5.9     | 16                 | 15                 |
| SI      | 20  | 1     | 95.2  | 4.8     | 20                 | 19                 |
| ES      | 53  | 7     | 88.3  | 11.7    | 7.6                | 46                 |
| SE      | 33  | 11    | 75    | 25      | 3                  | 22                 |
| CH      | 48  | 17    | 73.8  | 26.2    | 2.8                | 31                 |
| UK      | 36  | 15    | 70.6  | 29.4    | 2.4                | 21                 |

<sup>1</sup> The X23 gender ratio (X23GR) of mortality, was obtained by dividing the number of male who died from a X23 cause (♂X23), by the number of female who died from a X23 cause (♀X23).

<sup>2</sup> The X23 gender differential (X23GD) in mortality is the absolute difference of the male (♂X23) and female (♀X23) who died from a X23 cause.
