# Supplementary material for: What We Know About Sting-Related Deaths? Human Fatalities Caused by Hornet, Wasp and Bee Stings in Europe (1994-2016)
Source: Preprints.org preprint supplement (doi:10.20944/preprints202112.0483.v1), 2021-12-30
Supplement: Supplementary file 2 [file supplementary]

**Supplementary Table 1.** Place of occurrence code. The following categories are provided to be used as separate variables in addition to ICD categories W00-Y34 to identify the place of occurrence of the external cause where relevant.

| Code | Place                                                     | Included                                                                                                                                                                                                                                                                                                                                                                                                                          | Excluded <sup>*</sup>                                                                                                                                                   |
|------|-----------------------------------------------------------|-----------------------------------------------------------------------------------------------------------------------------------------------------------------------------------------------------------------------------------------------------------------------------------------------------------------------------------------------------------------------------------------------------------------------------------|-------------------------------------------------------------------------------------------------------------------------------------------------------------------------|
| 0    | Home.                                                     | Apartment; Boarding-house; Caravan [trailer] park, residential; Farmhouse; Home premises; House (residential); Noninstitutional place of residence; Private: driveway to home, garage, garden to home and yard to home; and Swimming-pool in private house or garden.                                                                                                                                                             | (i) Abandoned or derelict house <sup>8</sup> ; (ii) home under construction but not yet occupied <sup>6</sup> and (iii) institutional place of residence <sup>1</sup> . |
| 1    | Residential institution.                                  | Children's home; Dormitory; Home for the sick; Hospice; Military camp; Nursing home; Old people's home; Orphanage; Pensioner's home; Prison; and Reform school.                                                                                                                                                                                                                                                                   |                                                                                                                                                                         |
| 2    | School, other institution and public administrative area. | Building (including adjacent grounds) used by the general public or by a particular group of the public such as: assembly hall, campus, church, clubhouse, college, court-house, dancehall, day nursery, gallery, hospital, institute for higher education, kindergarten, library, movie-house, museum, music-hall, opera-house, post office, public hall, school (private)(public)(state), theatre, university and youth centre. | (i) Building under construction <sup>6</sup> ; (ii) residential institution <sup>1</sup> and (iii) sports and athletics area <sup>3</sup> .                             |
| 3    | Sports and athletics area.                                | Baseball field; Basketball-court; Cricket ground; Football field; Golf-course; Gymnasium; Hockey field; Riding-school; Skating-rink; Squash-court; Stadium; Swimming-pool, public; and Tennis-court.                                                                                                                                                                                                                              | Swimming-pool or tennis-court in private home or garden <sup>0</sup> .                                                                                                  |
| 4    | Street and highway.                                       | Freeway; Motorway; Pavement; Road and Sidewalk.                                                                                                                                                                                                                                                                                                                                                                                   |                                                                                                                                                                         |
| 5    | Trade and service area.                                   | Airport; Bank; Café; Casino; Garage (commercial); Gas station; Hotel; Market; Office building; Petrol station; Radio or television station; Restaurant; Service station; Shop (commercial); Shopping mall; Station (bus)(railway); Store; Supermarket and Warehouse.                                                                                                                                                              | Garage in private home <sup>0</sup> .                                                                                                                                   |
| 6    | Industrial and construction area.                         | Building [any] under construction; Dockyard; Dry dock; Factory: building and premises; Gasworks; Industrial yard; Mine; Oil rig and other offshore installations; Pit (coal)(gravel)(sand); Power-station (coal)(nuclear)(oil); Shipyard; Tunnel under construction and Workshop.                                                                                                                                                 |                                                                                                                                                                         |
| 7    | Farm.                                                     | Farm: (i) buildings, (ii) land under cultivation and (iii) ranch.                                                                                                                                                                                                                                                                                                                                                                 | Farmhouse and home premises of farm <sup>0</sup> .                                                                                                                      |
| 8    | Other specified places.                                   | Beach; Campsite; Canal; Caravan site NOS; Derelict house; Desert; Dock NOS; Forest; Harbour; Hill; Lake; Marsh; Military training ground; Mountain; Park (amusement) (public); Parking-lot and parking-place; Pond or pool; Prairie; Public place NOS; Railway line; River; Sea; Seashore; Stream; Swamp; Water reservoir and Zoo.                                                                                                |                                                                                                                                                                         |
| 9    | Unspecified place                                         |                                                                                                                                                                                                                                                                                                                                                                                                                                   |                                                                                                                                                                         |

<sup>\*</sup> The superscript number corresponds to the category in which those places should be included.
