# Supplementary material for: What We Know About Sting-Related Deaths? Human Fatalities Caused by Hornet, Wasp and Bee Stings in Europe (1994-2016)
Source: Preprints.org preprint supplement (doi:10.20944/preprints202112.0483.v1), 2021-12-30
Supplement: Supplementary file 3 [file supplementary]

**Supplementary Table 5.** Hymenopteran sting-related mortality rates (X23MR) during the studied period (1994-2016) calculated on the basis of the yearly population size of each country as reported on the census, as of 1 January of each year. The X23MR are expressed per year and per 1,000,000 inhabitants.

|    | 1994 | 1995 | 1996 | 1997 | 1998 | 1999 | 2000 | 2001 | 2002 | 2003 | 2004 | 2005 | 2006 | 2007 | 2008 | 2009 | 2010 | 2011 | 2012 | 2013 | 2014 | 2015 | 2016 | Min  | Max  | Standard deviation | Average |
|----|------|------|------|------|------|------|------|------|------|------|------|------|------|------|------|------|------|------|------|------|------|------|------|------|------|--------------------|---------|
| AT |      |      |      |      |      |      |      |      | 0    | 0.25 | 0.38 | 0.63 | 1.51 | 0.88 | 0.62 | 0.87 | 0.62 | 1.23 | 0.37 | 0.12 | 0.61 | 0.24 | 0.72 | 0    | 1.51 | 0.41               | 0.6     |
| BE |      |      |      |      | 0.1  | 0    | 0.1  | 0.1  | 0.19 | 0.19 | 0.39 | 0.1  | 0    | 0.1  | 0    | 0.49 | 0    | 0.19 | 0    | 0.29 | 0.19 | 0.19 |      | 0    | 0.49 | 0.14               | 0.15    |
| BA |      |      |      |      |      |      |      |      |      |      |      |      |      |      |      |      |      | 0    |      |      |      |      |      | 0    | 0    | 0                  | 0       |
| BG |      |      |      |      |      |      |      |      |      |      |      | 0.13 | 0.26 | 0.4  | 0.67 | 0.27 | 0.27 | 0.27 | 0.41 | 0.82 |      |      |      | 0.13 | 0.82 | 0.22               | 0.39    |
| HR |      | 0.43 | 0.22 | 0.66 | 0    | 0    | 0.22 | 0.23 | 0.23 | 0.7  | 0.23 | 0    | 0.46 | 0.23 | 0.46 | 0.93 | 0.46 | 0    | 1.4  | 1.17 |      |      |      | 0    | 1.4  | 0.4                | 0.42    |
| CZ | 0.39 | 0.39 | 0.68 | 0.68 | 0.87 | 0.29 | 0.39 | 0.59 | 0    | 1.37 | 0.29 | 0.29 | 0.39 | 0.2  | 0.58 | 0.86 | 0.19 | 0.67 | 0.29 | 0.48 | 0.19 | 0.28 | 0.38 | 0    | 1.37 | 0.3                | 0.47    |
| EE |      |      |      | 0    | 0    | 0    | 0.71 | 0    | 2.17 | 0.73 | 0.73 | 0.74 | 0    | 0    | 2.24 | 0.75 | 0.75 | 0    | 1.51 | 0    |      |      |      | 0    | 2.24 | 0.75               | 0.61    |
| FI |      |      | 0    | 0.39 | 0    | 0.58 | 0    | 0.39 | 0.19 | 0.38 | 0.19 | 0    | 0.19 | 0    | 0    | 0    | 0.37 | 0.37 | 0.37 | 0.55 | 0.73 | 0    |      | 0    | 0.73 | 0.23               | 0.24    |
| FR |      |      |      |      |      |      | 0.17 | 0.18 | 0.16 | 0.23 | 0.37 | 0.32 | 0.16 | 0.19 | 0.22 | 0.22 | 0.23 | 0.22 | 0.23 | 0.14 | 0.3  |      |      | 0.14 | 0.37 | 0.06               | 0.22    |
| DE |      |      |      |      | 0.22 | 0.26 | 0.24 | 0.17 | 0.13 | 0.36 | 0.39 | 0.22 | 0.35 | 0.12 | 0.15 | 0.22 | 0.2  | 0.25 | 0.17 | 0.2  | 0.07 | 0.27 |      | 0.07 | 0.39 | 0.08               | 0.22    |
| EL |      |      |      |      |      |      |      |      |      |      |      |      |      |      |      |      |      |      |      |      | 0.37 | 0.46 |      | 0.37 | 0.46 | 0.07               | 0.41    |
| HU |      |      | 0.19 | 0.39 | 0.39 | 0.2  | 0.78 | 0.1  | 0.39 | 0.39 | 0.3  | 0.2  | 0.3  | 0.5  | 0.8  | 0.4  | 0    | 0.8  | 1.11 | 1.31 | 1.01 | 0.91 | 0.71 | 0    | 1.31 | 0.36               | 0.53    |
| IS |      |      | 0    | 0    | 0    | 0    | 0    | 0    | 0    | 0    | 0    | 0    | 0    | 0    | 0    | 0    | 0    | 0    | 0    | 0    | 0    | 0    | 0    | 0    | 0    | 0                  | 0       |
| IE |      |      |      |      |      |      |      |      |      |      |      |      | 0    | 0    | 0.22 | 0    | 0.22 | 0    | 0    | 0    | 0    |      |      | 0    | 0.22 | 0.1                | 0.05    |
| IT |      |      |      |      |      |      |      |      |      | 0.09 | 0.09 | 0.03 | 0.09 | 0.02 | 0.05 | 0.15 | 0.19 | 0.2  | 0.1  | 0.05 | 0.07 | 0.05 |      | 0.02 | 0.2  | 0.06               | 0.09    |
| LV |      |      | 0.81 | 0.82 | 0    | 0.42 | 0    | 0.85 | 0.86 | 0    | 0    |      |      |      |      |      |      |      |      |      |      |      |      | 0    | 0.86 | 0.42               | 0.42    |

|    |                           |      |      |      |      |      |      |      |      |      |      |      |      |      |      |      |      |      |      |      |                 |                     |                     |      |      |      |      |
|----|---------------------------|------|------|------|------|------|------|------|------|------|------|------|------|------|------|------|------|------|------|------|-----------------|---------------------|---------------------|------|------|------|------|
| LT | 0.28 1.13 0 0 0 0.29 0.29 |      |      |      |      |      |      |      |      |      |      |      |      |      |      |      |      |      |      |      | 0 1.13 0.4 0.29 |                     |                     |      |      |      |      |
| LU | 0 0 0 0 0 0 2.2           |      |      |      |      |      |      |      |      |      |      |      |      |      |      |      |      |      |      |      | 0 2.2 0.83 0.31 |                     |                     |      |      |      |      |
| MT | 0                         | 0    | 0    | 0    | 0    | 0    | 0    | 0    | 0    | 0    |      |      |      |      |      |      |      |      |      |      | 0               | 0                   | 0                   | 0    |      |      |      |
| ME |                           |      |      |      |      | 0    | 0    | 0    | 0    | 0    |      |      |      |      |      |      |      |      |      |      | 0               | 0                   | 0                   | 0    |      |      |      |
| NL | 0.32                      |      | 0.06 | 0.06 | 0    | 0.13 | 0    | 0.06 | 0    | 0.06 | 0    | 0.06 | 0.12 | 0.06 | 0.06 | 0    | 0    | 0    | 0.12 | 0    | 0               | 0.12                | 0                   | 0.32 | 0.08 | 0.06 |      |
| NO | 0.69                      |      | 0.46 | 0.23 | 0.22 | 0.22 | 0.22 | 0.22 | 0.22 | 0.22 | 0    | 0    | 0.21 | 0    | 0.21 | 0.21 | 0    | 0.4  | 0    | 0.2  | 0.19            | 0 0.69 0.17 0.21    |                     |      |      |      |      |
| PL |                           |      |      |      |      | 0.18 | 0.21 | 0.08 | 0.18 | 0.21 | 0.24 | 0.1  | 0.26 | 0.24 | 0.24 | 0.16 | 0.18 | 0.21 | 0.32 | 0.11 | 0.08            | 0.29                | 0.08                | 0.32 | 0.07 | 0.19 |      |
| PT |                           |      |      |      |      |      |      |      | 0.1  | 0    | 0    | 0    | 0    | 0.28 | 0.09 | 0    | 0    | 0    | 0    | 0    | 0.38            | 0 0.38 0.13 0.07    |                     |      |      |      |      |
| RO |                           |      |      |      |      | 0.22 | 0.49 | 0.4  | 0.46 | 0.55 | 0.46 | 0.47 | 0.38 | 0.14 | 0.39 | 0.2  | 0.44 | 0.1  | 0.5  | 0.45 | 0.25            | 0.81                | 0.4                 | 0.1  | 0.81 | 0.17 | 0.4  |
| RS | 0.13                      |      |      |      | 0.26 | 0.4  | 0.4  | 0.27 | 0.67 | 0.54 | 0.13 | 0.4  | 0.27 | 0.41 | 0.68 | 0.55 | 0.83 | 0.42 | 0.28 | 0.42 | 0.14            | 0.13 0.83 0.2 0.4   |                     |      |      |      |      |
| SK | 0.19                      | 0.19 | 0.37 | 0.19 | 0    | 0.19 | 0.19 | 0    | 0    | 0.37 | 0.19 | 0    | 0    | 0    | 0.19 | 0.37 | 0    | 0    | 0.37 | 0    | 0.37            | 0 0.37 0.15 0.15    |                     |      |      |      |      |
| SI | 0.5                       |      |      |      | 0    | 0    | 0.5  | 0    | 0.5  | 1.5  | 0    | 0    | 0.5  | 1.49 | 0    | 1.48 | 0    | 1.46 | 0    | 0.49 | 0               | 1.94                | 0 1.94 0.67 0.55    |      |      |      |      |
| ES |                           |      |      |      |      | 0.1  | 0.07 | 0.1  | 0.12 | 0.12 | 0.05 | 0.09 | 0.07 | 0.02 | 0.02 | 0.13 | 0.04 | 0.09 | 0.06 | 0.04 | 0.17            | 0.06                | 0.02 0.17 0.04 0.08 |      |      |      |      |
| SE | 0.68                      |      |      |      | 0.11 | 0.11 | 0.11 | 0    | 0.34 | 0.22 | 0.22 | 0    | 0.11 | 0.33 | 0.33 | 0.11 | 0.11 | 0.32 | 0.11 | 0.52 | 0.31            | 0.31                | 0.41                | 0    | 0.68 | 0.17 | 0.24 |
| CH | 0.57                      | 0.28 | 0.42 | 1.13 | 0.28 | 0.14 | 0.42 | 0.28 | 0.55 | 0.54 | 0.27 | 0.54 | 0.53 | 0.13 | 0.39 | 0.26 | 0.64 | 0.38 | 0.5  | 0.12 | 0.36            | 0.12 1.13 0.22 0.42 |                     |      |      |      |      |
| UK |                           |      |      |      |      |      |      | 0.02 | 0.03 | 0.1  | 0.12 | 0.07 | 0.07 | 0.07 | 0.03 | 0.08 | 0.08 | 0.03 | 0.02 | 0.03 | 0.06            | 0.03                | 0.02 0.12 0.03 0.06 |      |      |      |      |
