# Supplementary material for: What We Know About Sting-Related Deaths? Human Fatalities Caused by Hornet, Wasp and Bee Stings in Europe (1994-2016)
Source: Preprints.org preprint supplement (doi:10.20944/preprints202112.0483.v1), 2021-12-30
Supplement: Supplementary file 4 [file supplementary]

**Supplementary Table 2.** Absolute and relative frequency of the deaths due to hornet, wasp and bee stings by place of occurrence.

| Country | X23 <sup>1</sup> | X23.four<br>digit | Home<br>(X23.0) | Residential<br>institution<br>(X23.1) | Public area<br>(X23.2) | Sporting<br>area<br>(X23.3) | Street and<br>highway<br>(X23.4) | Trade and<br>service area<br>(X23.5) | Industrial<br>area<br>( X23.6) | Farm<br>(X23.7) | Others<br>(X23.8) | Unspecified<br>place<br>(X23.9) |
|---------|------------------|-------------------|-----------------|---------------------------------------|------------------------|-----------------------------|----------------------------------|--------------------------------------|--------------------------------|-----------------|-------------------|---------------------------------|
| AT      | -                | 73 (100%)         | 11<br>(15.1%)   | 1<br>(1.4%)                           | -                      | -                           | -                                | -                                    | -                              | -               | 39<br>(53.4%)     | 22<br>(30.1%)                   |
| BE      | 1<br>(3.7%)      | 26<br>(96.3%)     | 6<br>(22.2%)    | 1<br>(3.7%)                           | 1<br>(3.7%)            | -                           | 3<br>(11.1%)                     | -                                    | -                              | -               | 2<br>(7.4%)       | 13<br>(48.1%)                   |
| BA      | -                | -                 | -               | -                                     | -                      | -                           | -                                | -                                    | -                              | -               | -                 | -                               |
| BG      | 20<br>(76.9%)    | 6<br>(23.1%)      | 2<br>(7.7%)     | -                                     | -                      | -                           | -                                | -                                    | -                              | 2<br>(7.7%)     | 2<br>(7.7%)       | -                               |
| HR      | -                | 35<br>(100%)      | 13<br>(37.1%)   | -                                     | -                      | -                           | -                                | -                                    | -                              | -               | 9<br>(25.7%)      | 13<br>(37.1%)                   |
| CZ      | -                | 111<br>(100%)     | 39<br>(35.1%)   | 3<br>(2.7%)                           | 1<br>(0.9%)            | -                           | 1<br>(0.9%)                      | -                                    | -                              | 2<br>(1.8%)     | -                 | 65<br>(58.6%)                   |
| EE      | 10<br>(71.4%)    | 4<br>(28.6%)      | -               | -                                     | -                      | -                           | -                                | -                                    | -                              | -               | -                 | 4<br>(28.6%)                    |
| FI      | 25<br>(100%)     | -                 | -               | -                                     | -                      | -                           | -                                | -                                    | -                              | -               | -                 | -                               |
| FR      | -                | 211<br>(100%)     | 88<br>(41.7%)   | -                                     | -                      | -                           | 25<br>(11.8%)                    | -                                    | -                              | 1<br>(0.5%)     | 5<br>(2.4%)       | 92<br>(43.6%)                   |
| DE      | -                | 327<br>(100%)     | 96<br>(29.4%)   | -                                     | -                      | -                           | 2<br>(0.6%)                      | -                                    | -                              | -               | 65<br>(19.9%)     | 164<br>(50.2%)                  |
| EL      | -                | 9<br>(100%)       | 1<br>(11.1%)    | -                                     | -                      | -                           | -                                | -                                    | -                              | -               | -                 | 8<br>(88.9%)                    |
| HU      | -                | 112<br>(100%)     | 46<br>(41.1%)   | -                                     | 3<br>(2.7%)            | -                           | 14<br>(12.5%)                    | -                                    | -                              | 7<br>(6.3%)     | 24<br>(21.4%)     | 18<br>(16.1%)                   |
| IS      | -                | -                 | -               | -                                     | -                      | -                           | -                                | -                                    | -                              | -               | -                 | -                               |
| IE      | -                | 2<br>(100%)       | -               | -                                     | -                      | -                           | -                                | -                                    | -                              | -               | -                 | 2<br>(100%)                     |
| IT      | -                | 69<br>(100%)      | 3<br>(4.3%)     | -                                     | -                      | -                           | 3<br>(4.3%)                      | -                                    | -                              | 1<br>(1.4%)     | 8<br>(11.6%)      | 54<br>(78.3%)                   |

|    |               |               |                |             |             |             |             |   |             |             |               |               |
|----|---------------|---------------|----------------|-------------|-------------|-------------|-------------|---|-------------|-------------|---------------|---------------|
| LV | 9<br>(100%)   | -             | -              | -           | -           | -           | -           | - | -           | -           | -             | -             |
| LT | 1<br>(14.3%)  | 6<br>(85.7%)  | 5<br>(71.4%)   | -           | -           | -           | -           | - | -           | -           | -             | 1<br>(14.3%)  |
| LU |               | 1<br>(100%)   | -              | -           | -           | -           | -           | - | -           | -           | -             | 1<br>(100%)   |
| MT | -             | -             | -              | -           | -           | -           | -           | - | -           | -           | -             | -             |
| ME | -             | -             | -              | -           | -           | -           | -           | - | -           | -           | -             | -             |
| NL | -             | 20<br>(100%)  | 1<br>(5%)      | -           | -           | -           | -           | - | -           | -           | -             | 19<br>(95%)   |
| NO | -             | 19<br>(100%)  | 2<br>(10.5%)   | 1<br>(5.3%) | -           | -           | -           | - | -           | -           | 1<br>(5.3%)   | 15<br>(78.9%) |
| PL | -             | 125<br>(100%) | 28<br>(22.4%)  | 2<br>(1.6%) | 1<br>(0.8%) | -           | -           | - | -           | 5<br>(4%)   | 17<br>(13.6%) | 72<br>(57.6%) |
| PT | -             | 9<br>(100%)   | -              | -           | -           | -           | -           | - | -           | -           | -             | 9<br>(100%)   |
| RO | -             | 149<br>(100%) | 125<br>(83.9%) | -           | -           | 1<br>(0.7%) | 2<br>(1.3%) | - | 1<br>(0.7%) | 2<br>(1.3%) | 3<br>(2%)     | 15<br>(10.1%) |
| RS | 52<br>(98.1%) | 1<br>(1.9%)   | -              | -           | -           | -           | -           | - | -           | 1<br>(1.9%) | -             | -             |
| SK | 13<br>(76.5%) | 4<br>(23.5%)  | 1<br>(5.9%)    | -           | -           | -           | -           | - | -           | -           | 2<br>(11.8%)  | 1<br>(5.9%)   |
| SI | 21<br>(100%)  | -             | -              | -           | -           | -           | -           | - | -           | -           | -             | -             |
| ES | -             | 60<br>(100%)  | 2<br>(3.3%)    | -           | 1<br>(1.7%) | -           | 3<br>(5%)   | - | -           | 4<br>(6.7%) | 4<br>(6.7%)   | 46<br>(76.7%) |
| SE | 7<br>(15.9%)  | 37<br>(84.1%) | -              | -           | -           | -           | -           | - | -           | -           | -             | 37<br>(84.1%) |
| CH | -             | 65<br>(100%)  | -              | -           | -           | -           | -           | - | -           | -           | 1<br>(1.5%)   | 64<br>(98.5%) |
| UK | -             | 51<br>(100%)  | 28<br>(54.9%)  | -           | -           | -           | 1<br>(2%)   | - | -           | 1<br>(2%)   | 8<br>(15.7%)  | 13<br>(25.5%) |

<sup>1</sup>Supplementary Table S1 lists the included and excluded places in each category: X23.0, X23.1, X23.2, X23.3, X23.4, X23.5, X23.6, X23.7, X23.8 and X23.9.
