# Supplementary material for: What We Know About Sting-Related Deaths? Human Fatalities Caused by Hornet, Wasp and Bee Stings in Europe (1994-2016)
Source: Preprints.org preprint supplement (doi:10.20944/preprints202112.0483.v1), 2021-12-30
Supplement: Supplementary file 5 [file supplementary]

**Supplementary Table 3.** Absolute and relative frequency of the deaths due to hornet, wasp and bee stings by age.

| Country                   | Children<br>(≤ 14 years) | Youth<br>(15-24 years) | Adults<br>(25-64 years) | Seniors<br>(≥ 65 years) |
|---------------------------|--------------------------|------------------------|-------------------------|-------------------------|
| Austria                   | 1 (1.4%)                 | 3 (4.1%)               | 43 (58.9%)              | 26 (35.6%)              |
| Belgium                   | 0                        | 0                      | 19 (70.4%)              | 8 (29.6%)               |
| Bosnia and<br>Herzegovina | 0                        | 0                      | 0                       | 0                       |
| Bulgaria                  | 0                        | 0                      | 20 (76.9%)              | 6 (23.1%)               |
| Croatia                   | 1 (2.9%)                 | 0                      | 29 (82.9%)              | 5 (14.3%)               |
| Czechia                   | 0                        | 1 (0.9%)               | 81 (73%)                | 29 (26.1%)              |
| Estonia                   | 0                        | 0                      | 12 (85.7%)              | 2 (14.3%)               |
| Finland                   | 0                        | 0                      | 18 (72%)                | 7 (28%)                 |
| France                    | 2 (0.9%)                 | 1 (0.5%)               | 110 (52.1%)             | 98 (46.4%)              |
| Germany                   | 0                        | 1 (0.3%)               | 215 (65.7%)             | 111 (33.9%)             |
| Greece                    | 0                        | 0                      | 5 (55.6%)               | 4 (44.4%)               |
| Hungary                   | 0                        | 2 (1.8%)               | 86 (76.8%)              | 24 (21.4%)              |
| Iceland                   | 0                        | 0                      | 0                       | 0                       |
| Ireland                   | 0                        | 0                      | 2 (100%)                | 0                       |
| Italy                     | 0                        | 1 (1.4%)               | 42 (60.9%)              | 26 (37.7%)              |
| Latvia                    | 0                        | 0                      | 8 (88.9%)               | 1 (11.1%)               |
| Lithuania                 | 0                        | 1 (14.3%)              | 3 (42.9%)               | 3 (42.9%)               |
| Luxembourg                | 0                        | 0                      | 1 (100%)                | 0                       |
| Malta                     | 0                        | 0                      | 0                       | 0                       |
| Montenegro                | 0                        | 0                      | 0                       | 0                       |
| Netherlands               | 0                        | 0                      | 14 (70%)                | 6 (30%)                 |
| Norway                    | 0                        | 0                      | 10 (52.6%)              | 9 (47.4%)               |
| Poland                    | 0                        | 1 (0.8%)               | 95 (76%)                | 29 (23.2%)              |
| Portugal                  | 1 (11.1%)                | 0                      | 6 (66.7%)               | 2 (22.2%)               |
| Romania                   | 2 (1.3%)                 | 6 (4%)                 | 123 (82.6%)             | 18 (12.1%)              |
| Serbia                    | 0                        | 1 (1.9%)               | 41 (77.4%)              | 11 (20.8%)              |
| Slovakia                  | 1 (5.9%)                 | 0                      | 13 (76.5%)              | 3 (17.6%)               |
| Slovenia                  | 0                        | 1 (4.8%)               | 15 (71.4%)              | 5 (23.8%)               |
| Spain                     | 0                        | 0                      | 31 (51.7%)              | 29 (48.3%)              |
| Sweden                    | 0                        | 0                      | 25 (56.8%)              | 19 (43.2%)              |
| Switzerland               | 0                        | 2 (3.1%)               | 38 (58.5%)              | 25 (38.5%)              |
| United Kingdom            | 0                        | 0                      | 35 (68.6%)              | 16 (31.4%)              |
