# Supplementary material for: What We Know About Sting-Related Deaths? Human Fatalities Caused by Hornet, Wasp and Bee Stings in Europe (1994-2016)
Source: Preprints.org preprint supplement (doi:10.20944/preprints202112.0483.v1), 2021-12-30
Supplement: Supplementary file 6 [file supplementary]

Archive with 5 entries (5 files):
- Supplementary Tables/Supplementary Table 1.pdf
- Supplementary Tables/Supplementary Table 2.pdf
- Supplementary Tables/Supplementary Table 3.pdf
- Supplementary Tables/Supplementary Table 4.pdf
- Supplementary Tables/Supplementary Table 5.pdf
